# Supplementary material
Source: MDPI journal article supplement (https://www.mdpi.com/2813-1851/2/4/23)

## Supplementary Material

### Method: CME performance

Electroanalysis was performed in a 5 mL conventional electrochemical cell containing 3 mL of 0.1 mol L<sup>-1</sup> KCl support electrolyte in methanol/water, 1:24 (v/v). The potential values ranged from 0.80 V to 1.30 V, the scan speed was 100 mV s<sup>-1</sup>, and the equilibrium potential was 0.8 V, applied for 5 s. Experiments were performed with 7.96 µmol L<sup>-1</sup> MDMA or without MDMA. Glassy carbon was analyzed in the same conditions for comparative purposes. For each tested CME, sequential cyclic voltammetry cycles (n = 6) with an equilibrium potential of 0.8 V for 5 s were employed. CME performance was checked by analyzing the peak potential (E<sub>p</sub>) and peak current (I<sub>p</sub>). Standard deviation was assessed by analyzing the mean E<sub>p</sub> and I<sub>p</sub> of the electrodes. The relative standard deviation of E<sub>p</sub> (RSD E<sub>p</sub>%) and the relative standard deviation of I<sub>p</sub> (RSD I<sub>p</sub>%) were calculated. Statistical analyses were performed with the software Microsoft® Excel 365. For statistical evaluations, the Test F was employed; 95% of confidence interval was considered. Differences in inter-variances occurred when F < F<sub>critic</sub> (0.05). Next, the Student's t test was employed by assuming that both groups had the same variance and considering a 95% confidence interval. Results were considered significantly different when p < 0.05. The best electrode was selected for the subsequent analyses.

### Method: Pre-concentration time evaluation

Electroanalysis was performed in a 5 mL conventional electrochemical cell containing 3 mL of 0.1 mol L<sup>-1</sup> KCl support electrolyte in methanol/water, 1:24 (v/v). Experiments were performed with 5.17 µmol L<sup>-1</sup> MDMA, and the blank was analyzed without MDMA. The current signal of CME 1.5 was evaluated with or without pre-concentration time. The potential values ranged from 0.80 to 1.30 V (and from 1.30 V to 0.80 V), the scan speed was 100 mV s<sup>-1</sup>, and pre-concentration was performed at 0.8 V for 0, 5, 60, 180, 270, 360, 480, 540, or 600 s for each cycle. I<sub>p</sub> was measured, and the results were compared with the difference in the signal obtained for a pre-concentration time of 5 s, as a percentage. This parameter was named I<sub>p</sub> addition.

## Supplementary Figures

**Figure S1.** Seized ecstasy samples.

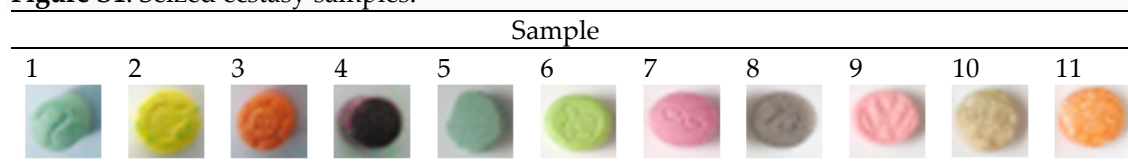

**Figure S2.** Pre-concentration time study: cyclic voltammetry employing CME 1.5 (polymer % (v/v)). (a) Twenty consecutive cycles: 1—Blank: pre-concentration time of 60 s. 2—1st cycle. Bulk with MDMA: pre-concentration time of 60 s. 3—2nd to 20th cycle. Bulk with MDMA: without pre-concentration time. (b) Twenty non-consecutive cycles: 1st to 20th cycle. Bulk with MDMA: pre-concentration time of 60 s.

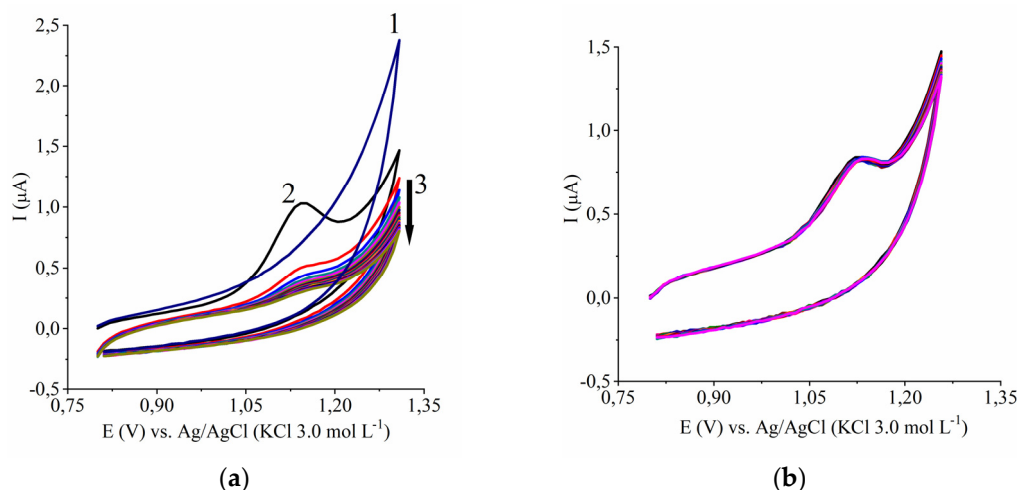

**Figure S3.** Evaluation of pre-concentration time: (a) voltammograms recorded with different pre-concentration time (5 – 600 s); (b) graph of the peak current as a function of pre-concentration time; (c) table of the peak current and the increase in the peak current, in percentage, compared to the pre-concentration time of 5 s.

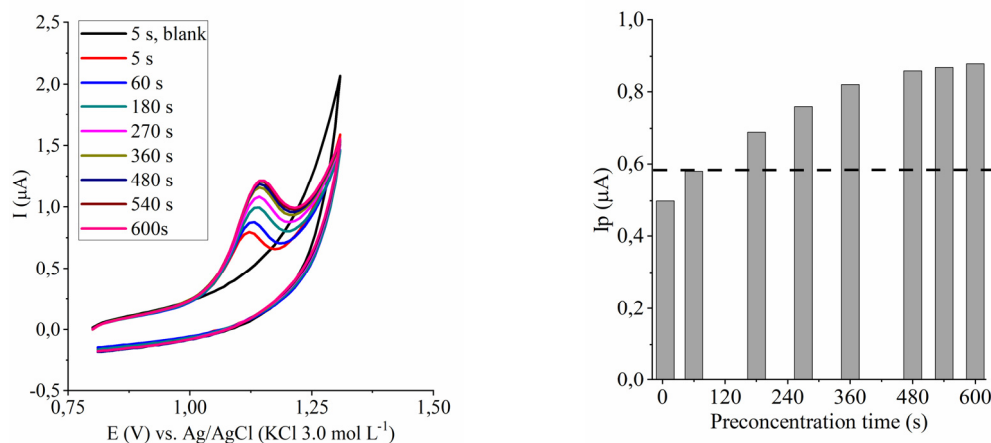

| Pre-concentration time (s) | Ip (μA) | Addition (%) |
|----------------------------|---------|--------------|
| 5                          | 0.50    | ---          |
| 60                         | 0.58    | 16           |
| 180                        | 0.69    | 38           |
| 270                        | 0.76    | 52           |
| 360                        | 0.82    | 64           |
| 480                        | 0.86    | 72           |
| 540                        | 0.87    | 74           |
| 600                        | 0.88    | 76           |

(c)

**Figure S4.** Colorimetric results of the Marquis test, sulfuric acid test, Simon’s test, and Simon’s test with acetone. From 0 to 48 h.

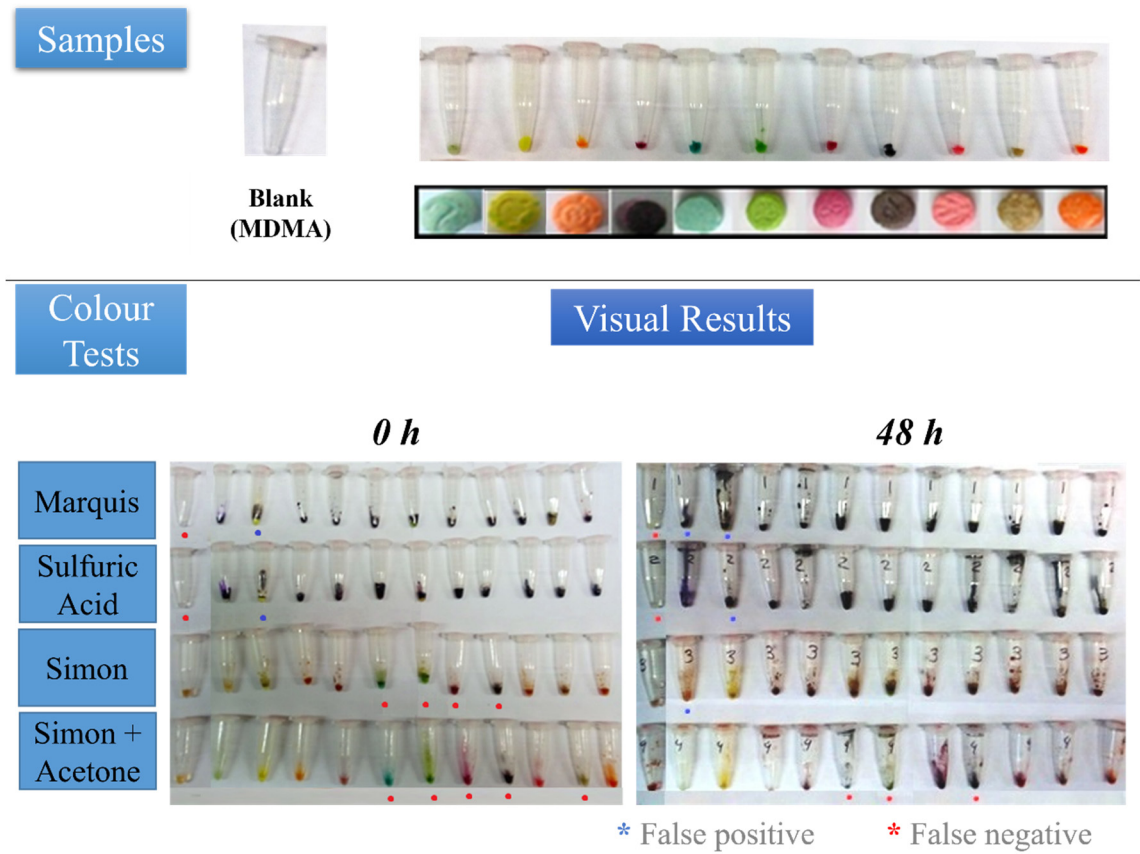

Supplement: s1 [file s1]
